# Supplementary material for: Tailoring NiCoCu layered double hydroxide with Ag-citrate/polyaniline/functionalized SWCNTs nanocomposites for supercapacitor applications
Source: Royal Society of Chemistry journal article supplement (doi:10.1039/d4ra01324g), 2024-01-01
Supplement: d4ra01324g1.pdf [file d4ra01324g1.pdf]

## Supplementary Data

### **Tailoring NiCoCu Layered Double Hydroxide with Ag-citrate/Polyaniline/functionalized SWCNTs nanocomposites for Supercapacitor Applications**

Syed Muhammad Abdullah<sup>a</sup>, Mohsin Ali Marwat<sup>a,\*</sup>,<sup>1</sup>, Kanwar Muhammad Adam<sup>a</sup>, Zia Ud Din<sup>a</sup>, Muhammad Humayun<sup>b</sup>, Muhammad Ramzan Abdul Karim<sup>a</sup>, Esha Ghazanfar<sup>a</sup>, Mohamed Bououdina<sup>b</sup>, Umaima Hamayun<sup>a</sup>

<sup>a</sup> Faculty of Materials and Chemical Engineering, Ghulam Ishaq Khan (GIK) Institute of Engineering Sciences and Technology, Topi, 23640, Pakistan

<sup>b</sup> Energy, Water, and Environment Lab, College of Humanities and Sciences, Prince Sultan University, Riyadh, 11586, Saudi Arabia

<sup>1</sup> Equal Contribution

\*Corresponding Author E-mail: mohsin.ali@giki.edu.pk, Tel: +92-938-281026, Fax: +92-938-281032

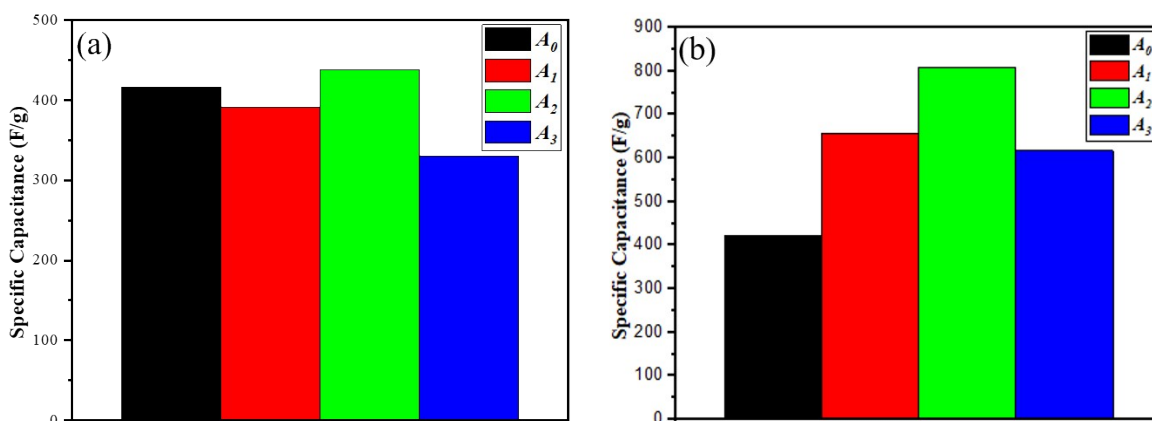

Fig S1 Specific Capacitance comparison of pristine A<sub>0</sub> and its composites A<sub>1</sub>, A<sub>2</sub>, and A<sub>3</sub> (a) calculated from CV at 10mV/s (b) calculated from GCD at 0.5 A/g.

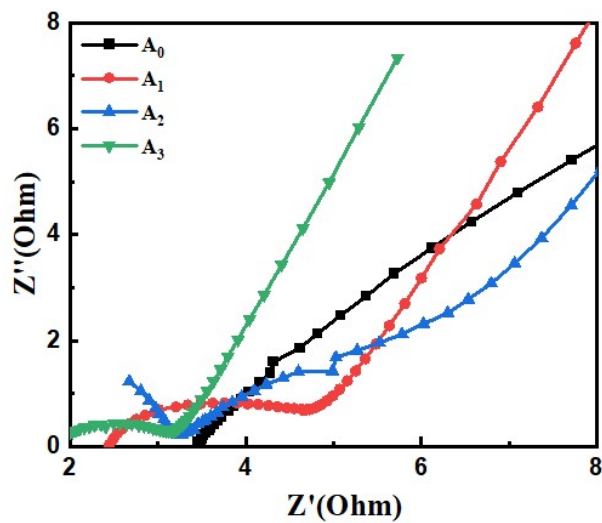

Fig S2 Magnified image of EIS Nyquist plot to visualize R<sub>ct</sub> values and Warburg impedance slope of pristine A<sub>0</sub> and its composites A<sub>1</sub>, A<sub>2</sub>, and A<sub>3</sub>.

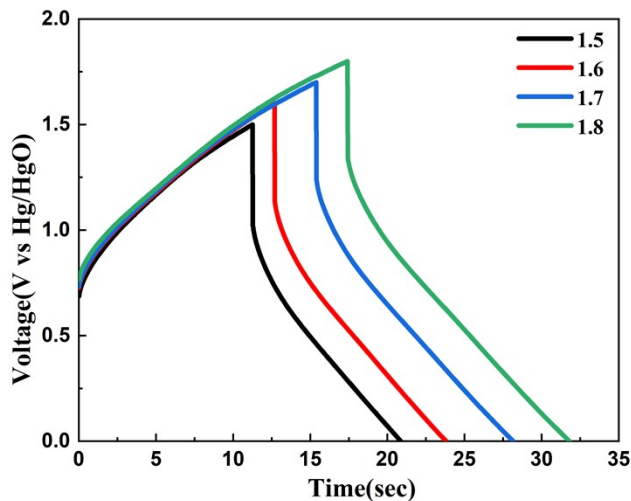

Fig S3 Galvanic charge-discharge of  $A_2||AC$  ASC device at different potential windows from 1.5 to 1.8 at a current density of 10 A/g.

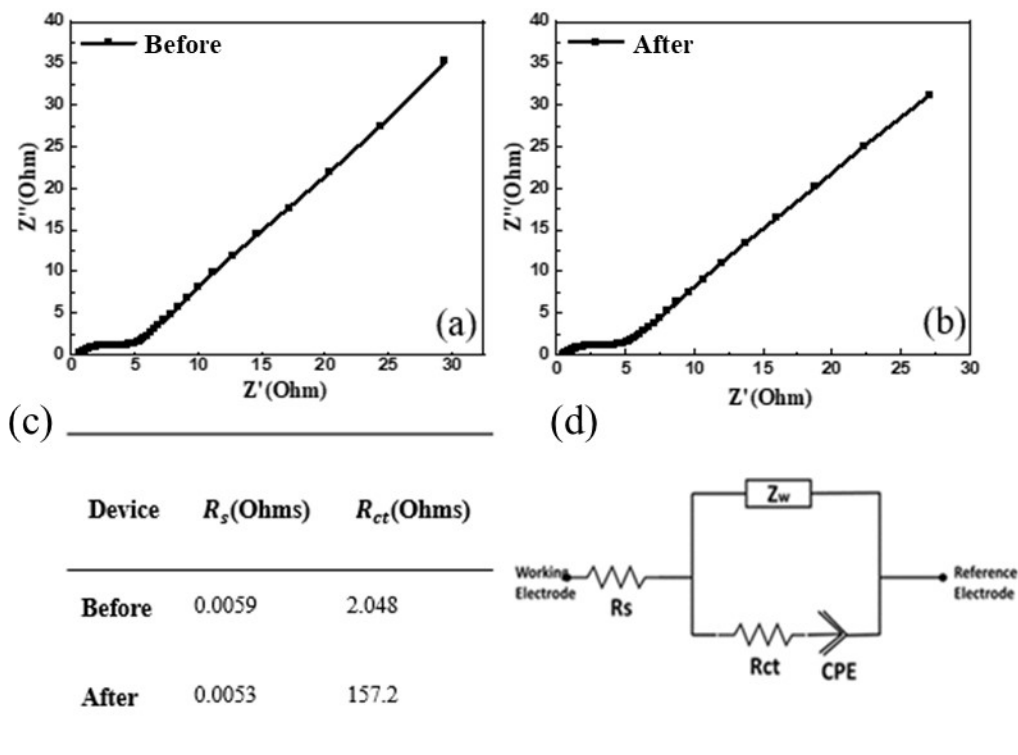

Fig S4  $A_2||AC$  ASC device's EIS (a) before and (b) after cycling stability test for 4000 cycles of  $A_2||AC$  ASC device. (c)  $R_s$  and  $R_{ct}$  values before and after 4000 cycles. (d) Inscribed EIS circuit.
